# Supplementary material
Source: PubMed Central journal article supplement (PMC3356615)
Supplement: 1116843109_pnas.201116843SI.pdf [file 1116843109_pnas.201116843SI.pdf]

# Supporting Information

Fischer et al. 10.1073/pnas.1116843109

## SI Text

**Cloning of Plasmids.** Sequences of all cloning primers are given in Table S2. The *singlet oxygen resistant 1 (SOR1)* cDNA was created by reverse transcribing the corresponding RNA from *sor1* or 4A+ using the specific primer *SOR1\_2534r*. Then, cDNAs were amplified with the same reverse primer and the forward primer *SOR1\_1f* using Phusion High-Fidelity DNA polymerase (New England Biolabs) and subcloned into the pPCR-ScriptAmpSK(+) (Stratagene) cloning vector. Accuracy of the cDNA sequences was confirmed by sequencing. Then, the *SOR1* coding regions of *sor1* and 4A+ were amplified with primers *SOR1\_186NdeI* and *SOR1\_1248EcoRI* to add *NdeI* and *EcoRI* restriction sites, and again, they were subcloned into ScriptAmpSK(+). Finally, the coding regions were cloned into the pSL18 overexpression vector containing the *PSAD* promoter by *NdeI* and *EcoRI* restriction and ligation (1).

Cloning of *GPXH-arylsulfatase (ARS)* reporter constructs was described (2). For  $\sigma$ -class glutathione-S-transferase 1 (*GSTSI*) reporter constructs, the *GSTSI* promoter was amplified with either of the forward primers *GSTSI\_f1* or *GSTSI\_f2KpnI* and the reverse primer *GSTSI\_r1EcoRV* to introduce a *KpnI* or *EcoRV* restriction site at the end of the fragments. PCR fragments were

subcloned into pPCR-ScriptAmpSK(+) (Stratagene) and sequenced. Putative regulatory elements were deleted in a PCR-based approach where the whole plasmids containing the promoter fragments were amplified with the Phusion High-Fidelity DNA polymerase (New England Biolabs) using primers *GSTSI $\Delta$ Pal1f*, *GSTSI $\Delta$ Pal2f*, *GSTSI $\Delta$ Pal3f*, or *GSTSI $\Delta$ CREf* containing a modified sequence of individual element together with the corresponding reverse primer *GSTSI $\Delta$ Pal1r*, *GSTSI $\Delta$ Pal2r*, *GSTSI $\Delta$ Pal3r*, or *GSTSI $\Delta$ CREr*, respectively. PCR products were religated, transformed into *Escherichia coli*, and tested for accuracy of promoter fragments containing the desired mutation by sequencing. The triple palindrome mutation was achieved by subsequent repetition of the PCR with all three primer pairs. Then, 700-bp fragments of these *GSTSI* promoters were cut out with *SacI*/*SpeI* and used to exchange the *SacI*/*NheI* fragment of the *HSP70A*-luciferase construct (3) to get the various *GSTSI-Gaussia luciferase (GLUC)* constructs where the expression of the *GLUC* gene is driven by an individual *GSTSI* promoter. Similarly, replacement of a 1-kb *KpnI-EcoRV* promoter fragment of plasmid pASPro1 containing the *ARS* gene (4) with the *KpnI/EcoRV* fragments of the cloned *GSTSI* promoters led to the different *GSTSI-ARS* constructs.

1. Fischer N, Rochaix JD (2001) The flanking regions of *PsaD* drive efficient gene expression in the nucleus of the green alga *Chlamydomonas reinhardtii*. *Mol Genet Genomics* 265:888–894.
2. Fischer BB, et al. (2009) Function and regulation of the glutathione peroxidase homologous gene *GPXH/GPX5* in *Chlamydomonas reinhardtii*. *Plant Mol Biol* 71: 569–583.

3. Shao N, Bock R (2008) A codon-optimized luciferase from *Gaussia princeps* facilitates the in vivo monitoring of gene expression in the model alga *Chlamydomonas reinhardtii*. *Curr Genet* 53:381–388.
4. Leisinger U, et al. (2001) The glutathione peroxidase homologous gene from *Chlamydomonas reinhardtii* is transcriptionally up-regulated by singlet oxygen. *Plant Mol Biol* 46:395–408.

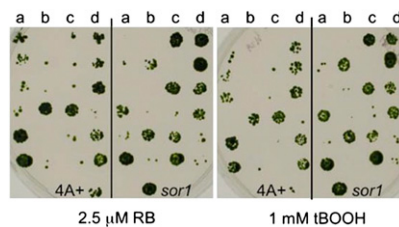

**Fig. S1.** Segregation of the reactive oxygen species resistance phenotype. *sor1* was backcrossed to the WT strain four times. Progeny from the fourth backcross was tested for resistance to rose bengal (RB) and *tert*-butylhydroperoxide (tBOOH). Shown are progeny from 12 complete tetrads arrayed in two columns. Individual members of a tetrad are labeled a–d. WT (4A+) and *sor1* controls were spotted at the bottom of each plate.

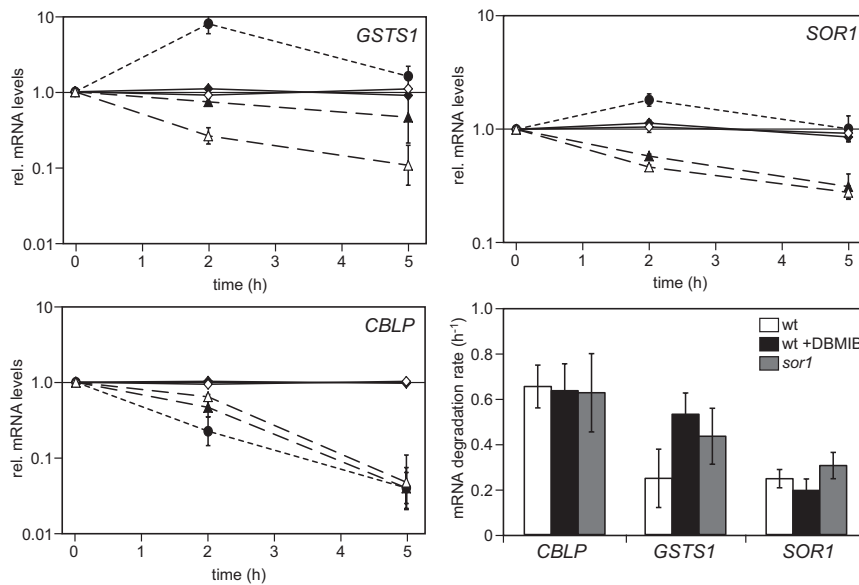

**Fig. S2.** Stability of the *GSTS1*, *SOR1*, and *CBLP* transcripts was determined in either the WT strain (closed symbols) or the *sor1* mutant (open symbols) by following mRNA levels after addition of actinomycin (50  $\mu\text{g}/\text{mL}$ ; dashed lines), actinomycin and 2,5-dibromo-3-methyl-6-isopropyl-*p*-benzoquinone (DBMIB; 2  $\mu\text{M}$ ; dotted lines), or no chemicals (full lines). DBMIB still caused a slight induction of *GSTS1* and *SOR1* even in the presence of actinomycin after 2 h, probably because of incomplete transcriptional inhibition at the beginning of the treatment. Comparison of degradation rates of *CBLP*, *GSTS1*, and *SOR1* mRNAs in *sor1*, the WT strain, and the WT exposed to DBMIB showed no significant difference in individual transcript stability between strains and treatments (degradation rates of DBMIB-treated samples were determined between 2 and 5 h of exposure).

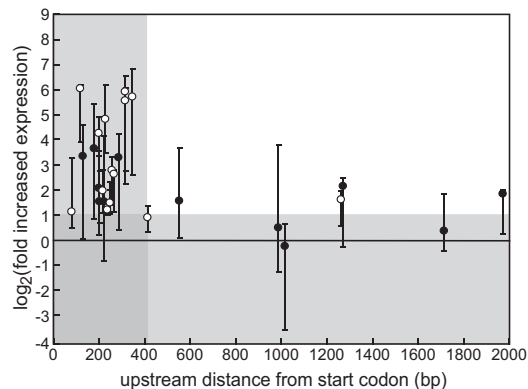

**Fig. S3.** Correlation of the positions of the 8-bp palindrome (electrophile response element) within the 2-kb promoter regions and the responses of the corresponding genes to the tested treatments. Circles show the median, and bars depict the minimal and maximal log<sub>2</sub> fold increased response in the following conditions compared with the untreated WT strain: *sor1* grown in synchronized or nonsynchronized WT cultures or WT treated with DBMIB, 2*E*-hexenal, neutral red (NR), or tBOOH. The 14 genes overexpressed more than twofold in *sor1* are indicated by ○, and the 12 genes strongly induced by chemical treatments are indicated by ●. Gray areas help to visualize sections of less than twofold induction and the first 400 bp of the proximal promoter regions.





**Table S1. Distribution of the annotated genes differently overexpressed more than twofold in synchronized cultures of *sor1* compared with WT into different functional groups**

| Cellular function                       | No. of annotated genes | Up-regulation (>2.0-fold) |                | Down-regulation (<0.5-fold) |                |
|-----------------------------------------|------------------------|---------------------------|----------------|-----------------------------|----------------|
|                                         |                        | No. of genes              | <i>P</i> value | No. of genes                | <i>P</i> value |
| Cell: organization                      | 127                    | 6                         | 0.56           | 5                           | 0.17           |
| Cell: division                          | 50                     | 5                         | 0.03           | 0                           |                |
| Cell: cycle                             | 64                     | 3                         | 0.24           | 11                          | 0.86           |
| Cell: vesicle transport                 | 48                     | 2                         | 0.22           | 4                           | 0.04           |
| Development                             | 124                    | 16                        | 0.34           | 6                           | 0.76           |
| DNA: synthesis/chromosome structure     | 275                    | 8                         | 0.56           | 1                           | 0.35           |
| DNA: repair                             | 59                     | 2                         | 0.35           | 1                           | 0.26           |
| Signaling                               | 285                    | 29                        | 0.86           | 9                           | 0.16           |
| RNA: regulation of transcription        | 402                    | 53                        | 0.70           | 8                           | 0.46           |
| RNA: transcription                      | 39                     | 10                        | 0.37           | 1                           | 0.54           |
| RNA: processing                         | 185                    | 18                        | 0.40           | 6                           | 0.18           |
| Protein: amino acid activation          | 65                     | 15                        | 0.25           | 3                           | 0.21           |
| Protein: synthesis                      | 226                    | 33                        | 0.39           | 11                          | 0.22           |
| Protein: posttranslational modification | 662                    | 71                        | 0.81           | 9                           | 0.32           |
| Protein: targeting                      | 131                    | 11                        | 0.85           | 10                          | 0.62           |
| Protein: degradation                    | 468                    | 64                        | 0.47           | 5                           | 0.55           |
| Redox regulation                        | 90                     | 15                        | 0.40           | 11                          | 0.92           |
| Stress response: abiotic                | 80                     | 8                         | 0.54           | 7                           | 0.26           |
| Stress response: biotic stress          | 22                     | 0                         |                | 4                           | 0.10           |
| Transport                               | 437                    | 36                        | 0.04           | 33                          | 0.20           |
| Metal handling                          | 12                     | 2                         | 0.46           | 0                           |                |
| Hormone metabolism                      | 67                     | 9                         | 0.62           | 1                           | 0.09           |
| Miscellaneous enzyme families           | 282                    | 17                        | 1.00           | 12                          | 0.48           |
| Not assigned/unknown                    | 10,828                 | 791                       | 0.01           | 320                         | 0.10           |

**Table S2. List of primers used for quantitative PCR and cloning**

| Primer name          | Sequence                                            |
|----------------------|-----------------------------------------------------|
| <i>GPXH</i>          | ACGTGTTTGACACGGTTATGAGA<br>GCAATTGGCATGATGGATAGTG   |
| <i>GSTS1</i>         | CAGAGGTGAAAGGCGGATAC<br>GTGTTGCAATGGACTTCAGC        |
| <i>GSTS2</i>         | ACCCCATCGGCAAAACAAG<br>CCGGTATAGTATTGTAGCAGAATAACCA |
| <i>SOR1</i>          | AAACCTTTTGCCGTTTGATGAA<br>CATTGGGAGCCAGATCCATCT     |
| <i>CBLP</i>          | GCCACACCGAGTGGGTGTCGTGCG<br>CCTTGCCGCCGAGGCGCACAGCG |
| <i>GSTS1_f2KpnI</i>  | acggtacCTCAGAACTGTGACGCTTGACAC                      |
| <i>GSTS1_r1EcoRV</i> | acgatatcGAGACAGTGAGCGTTATATCGAGCGAAGGGCC            |
| <i>GSTS1ΔPal1f</i>   | CGTTTGGCGTGTGGCGACCCCGACCGGGCGATCCCGGCATCCCG        |
| <i>GSTS1ΔPal1r</i>   | CTGGCGTTCGAAGCGACACAG                               |
| <i>GSTS1ΔPal2f</i>   | ATACGGGATGACGCAGGGGGCCCGACCGGACGAGTTGCTCGAGAAGGC    |
| <i>GSTS1ΔPal2r</i>   | CAACCGGGATTCCAACCTTGATG                             |
| <i>GSTS1ΔPal3f</i>   | TGCTCGAGAAGGCGGAAGCCCCGACCGCCTGTGCGTCTCCAGACTAT     |
| <i>GSTS1ΔPal3r</i>   | ACTCGTCCAACGTTGCCCC                                 |
| <i>GSTS1ΔCREf</i>    | TGGAATCCCGGTTGATACGGGACCGAGCAGGGGGCAACG             |
| <i>GSTS1ΔCREr</i>    | ACCTTGATGTCGGTGCCAGGTTAC                            |

**Table S3. List of molecular markers used for mapping of the *sor1* mutation**

| Name           | Primer sequences                                                             | Annealing temperature (°C) | Marker type     | Size (bp)          |                     |
|----------------|------------------------------------------------------------------------------|----------------------------|-----------------|--------------------|---------------------|
|                |                                                                              |                            |                 | 137c               | S1-C5               |
| <i>CHLH</i>    | TTGGCGGGTTGGTTGGACTAGG<br>TCCTCGGGGAGCGCTCTCG<br>CACAGCTCACACACACGCACAA      | 62                         | In/Del          | 127                | 375                 |
| <i>SFA</i>     | ACAGCATGCCCTGCAAGCTCGC<br>TTGCATGGGCAGCACTGGTCGA<br>GCCGTATAAATTCAGGGCAGGCGC | 62.4                       | In/Del          | 330                | 211                 |
| <i>CPN60B2</i> | AGCTGCTTGGCAGCGGCTGTTG<br>TGCAGCACAACCTCCCGGCTGC<br>TGGAATTGGCGGTGCGAGCG     | 61                         | In/Del          | 260                | 621                 |
| <i>C57_258</i> | GCTGTTAGGCCTGTCTGTACTT<br>TGACAAATTGAGTTGACCGACA                             | 54                         | In/Del          | 161                | 171                 |
| <i>C57_321</i> | GCGTCTGTCTCACTCTATCC<br>CGTGTATTGCGGTGTACAAG                                 | 54                         | +/-             | 800                | —                   |
| <i>C57_389</i> | CCCTCCACCAAGTGAATTGTTTAA<br>GAGCTTTCGTGTGACGTCGATTC                          | 63                         | dCAPS<br>(DraI) | 189                | 169<br>20           |
| <i>C57_407</i> | GCTCAACTTCTGCTCTGACGA<br>ATATGGTTTACACGCGCATTC                               | 54                         | CAPS<br>(AvaI)  | 390                | 370<br>20           |
| <i>C57_415</i> | GGCGTTAGTTCCTGGTGATG<br>CACTCAGCCCCTATCCTGAA                                 | 55                         | In/Del          | 598                | 480                 |
| <i>C57_506</i> | AACAGGGTCTGGTCTGGTTG<br>GGTGAATAGGGCTCCGCTTTG                                | 64.5                       | CAPS<br>(DdeI)  | 700                | 800<br>100          |
| <i>C57_554</i> | GAGATTGTTGAGGCTCCCTTC<br>GTACACTGCATCACGTCTTCGT                              | 55                         | CAPS<br>(SacII) | 500                | 700<br>200          |
| <i>SOR1</i>    | GCGGGGTGGGAGGGGTATG<br>GAGCACTGCAGTGTCAACCTGACAG                             | 58                         | CAPS<br>(TAQ1)  | 4A+<br><i>sor1</i> | 1,000<br>380<br>620 |

CAPS, cleaved amplified polymorphic sequence.

## Other Supporting Information Files

[Dataset S1 \(XLSX\)](#)
